# Supplementary material
Source: PubMed Central journal article supplement (PMC9112932)
Supplement: jb.00076-22-s0001.pdf [file jb.00076-22-s0001.pdf]

# 1 Interbacterial antagonism mediated by a released polysaccharide

## 2 Supplemental Information

### 3 4 Supplemental Methods

#### 5 Surfactant activity

6 The drop collapsed assay was performed as previously described(1). Briefly, filter-sterilized spent  
7 media of PAO1,  $\Delta PpsI$  and *rhlA*::Tn were serially diluted (1:1) with water supplemented with 0.005%  
8 crystal violet. 20 $\mu$ l of each dilution was spotted onto a plastic 96-well plate lid and tilted at a 90°  
9 angle. The downward migration of the droplets, resulting from surfactant activity, was recorded.  
10 Reduced surfactant concentration by dilution eventually resulted in the beading of the droplets.  
11 Surfactant scores were calculated as the reciprocal of the greatest dilution at which there was still  
12 surfactant activity.

#### 13 14 Protease assay

15 Skim milk plate assay was modified from an established protocol F. Casilag et al. (2). Briefly, 5 $\mu$ l  
16 of filter-sterilized PAO1,  $\Delta PpsI$  and *lasA*::Tn spent media, and 1mg/ml Proteinase K (Qiagen)  
17 were each spotted onto a milk agar plate (5% skim milk, 1.5% agar) and incubated overnight at  
18 37°C. Diameters of the clearing zone was measured and indicative of protease activity.

#### 19 20 Staphylolytic assay

21 Modified from an established protocol (3), overnight cultures of *S. aureus* USA300 were  
22 resuspended in PBS, heat-killed at 100°C for 10min and normalized to an OD<sub>600</sub> of 1.0. They were  
23 incubated with PAO1,  $\Delta PpsI$  and *lasA*::Tn spent media at 37°C for 7h. OD<sub>600</sub> was measured using  
24 a spectrophotometer, as an indication of cell lysis.

25

26 **Table S1 Primers**

| Name          | Sequence                              | Description              |
|---------------|---------------------------------------|--------------------------|
| pqsA-up_fwd   | taaaacgacggccagtgccGAAGCCTGCAAATGGCAG |                          |
| pqsA-up_rev   | acagcctgaaGACAGAACGTTCCCTCTTC         | for <i>pqsA</i> deletion |
| pqsA-down_fwd | acgttctgtcTTCAGGCTGTGGGGGTGAACC       |                          |
| pqsA-down_rev | gctcgtaccgggggatcctCGGATCACCGCCCAGCGC |                          |
| pvdA-up_fwd   | taaaacgacggccagtgccGTCAAGCGCAGATCGAGC |                          |
| pvdA-up_rev   | gtggcgccgaTTCCAGTTCCTCTGGATTGG        | for <i>pvdA</i> deletion |
| pvdA-down_fwd | ggaactggaaTCGGCGCCACGCCGCTAC          |                          |
| pvdA-down_rev | gctcgtaccgggggatcctCAACTGGCGTACCGCGGG |                          |

27

28 **Table S2 Screening for *P. aeruginosa* mutants with altered Psl distribution.**

|                      | Strains            | Cell-associated (%) | Cell-free (%) |
|----------------------|--------------------|---------------------|---------------|
| WT                   | PAO1               | 49.6                | 50.4          |
| LipidA pathway       | <i>pagP</i> ::Tn   | 25.9                | 74.1          |
|                      | <i>phoP</i> ::Tn   | 15.9                | 84.1          |
|                      | <i>phoQ</i> ::Tn   | 17.4                | 82.6          |
|                      | <i>pmrB</i> ::Tn   | 18.6                | 81.4          |
|                      | <i>htrB1</i> ::Tn  | 16.4                | 83.6          |
|                      | <i>htrB2</i> ::Tn  | 17.3                | 82.3          |
|                      | <i>lpxO1</i> ::Tn  | 15.2                | 84.8          |
|                      | <i>lpxO2</i> ::Tn  | 15                  | 85            |
|                      | <i>pagL</i> ::Tn   | 27.7                | 72.3          |
| Acyl-transferase     | <i>lptA</i> ::Tn   | 40.7                | 59.3          |
|                      | PW 1377            | 40.3                | 59.7          |
|                      | <i>lgt</i> ::Tn*   | 0                   | 0             |
|                      | <i>plsB</i> ::Tn** | 37.5                | 62.5          |
|                      | PA4351::Tn         | 32                  | 68            |
| Acyl carrier protein | <i>acpD</i> ::Tn** | 45.9                | 54.1          |
|                      | PA3334::Tn         | 36.7                | 63.3          |

29 \* No Psl detected

30 \*\* Showing the average of 3 mutants in the transposon library for the same gene.

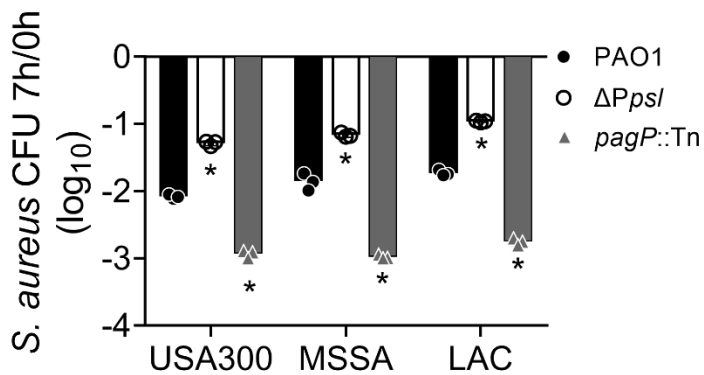

31  
 32 **Figure S1. Psl production promotes killing of various *S. aureus* strains.** Survival of *S. aureus*  
 33 USA300, MSSA and LAC, was quantified when co-cultured for 7h with *P. aeruginosa* PAO1,  
 34 ΔPpsl or pagP::Tn. *S. aureus* survival was presented as CFUs normalized to the starting CFUs  
 35 at 0h. Data presented as mean ± SD, individual points indicate the biological replicates (N = 3, n  
 36 = 3). Significance was determined using a two-way ANOVA. \*, P<0.05 compared to co-culture  
 37 with PAO1.

38

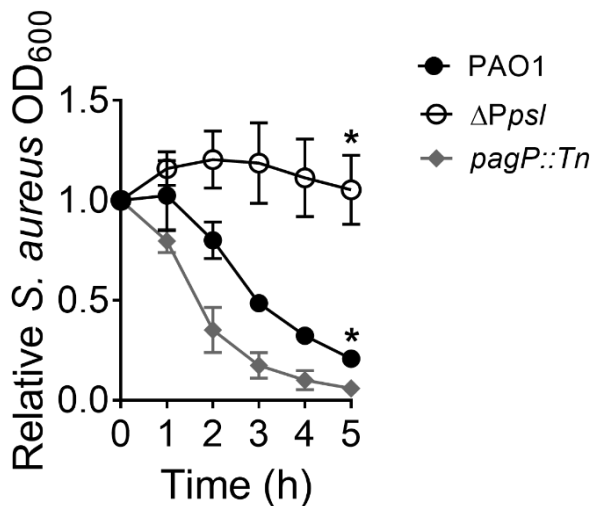

39 **Figure S2. Cell-free Psl promotes *S. aureus* killing in *P. aeruginosa* spent media.** Stationary  
 40 phase *S. aureus* USA300 (normalized to OD<sub>600</sub> = 1.5) was incubated with diluted spent media  
 41 from PAO1, ΔPpsl or pagP::Tn for 5h. *S. aureus* survival is presented as OD<sub>600</sub> normalized to the  
 42 starting OD<sub>600</sub> at 0h. Data presented as mean ± SD, individual points indicate the biological

43 replicates (N = 4, n = 3). Significance was determined using a Student's t-test. \*,  $P < 0.05$  compared  
 44 to PAO1.  
 45

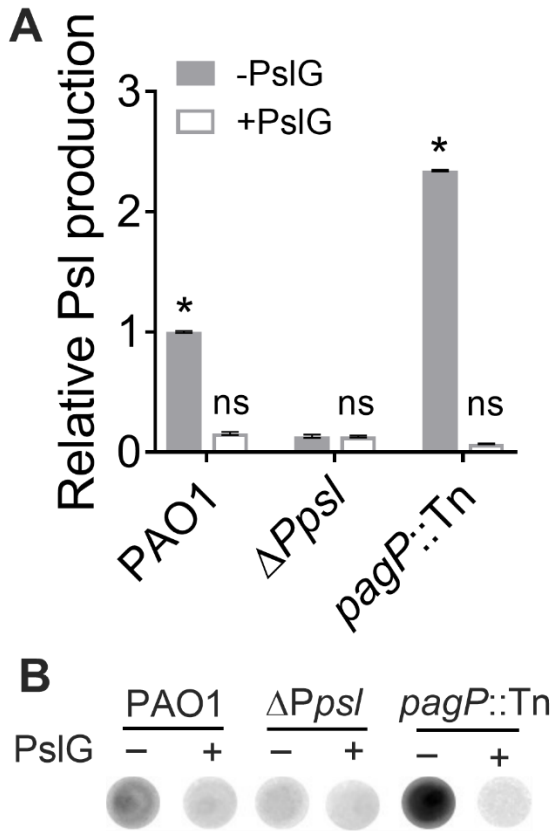

46 **Figure S3: PslG degrades secreted cell-free Psl in *P. aeruginosa* spent media.**

47 PAO1,  $\Delta Ppsl$  and *pagP::Tn* spent media were treated with (+) or without (-) 100 $\mu$ M PslG for 1h at  
 48 37°C to degrade Psl. Psl production was then measured by immunoblot assay and quantified by  
 49 densitometry **(A)**, shown in a representative image **(B)**. Data presented as mean  $\pm$  SD (N = 3, n  
 50 = 3). Significance was determined using one-way ANOVA. ns, not significant; \*,  $P < 0.05$  compared  
 51 to  $\Delta Ppsl$  - PslG.

52

53

54

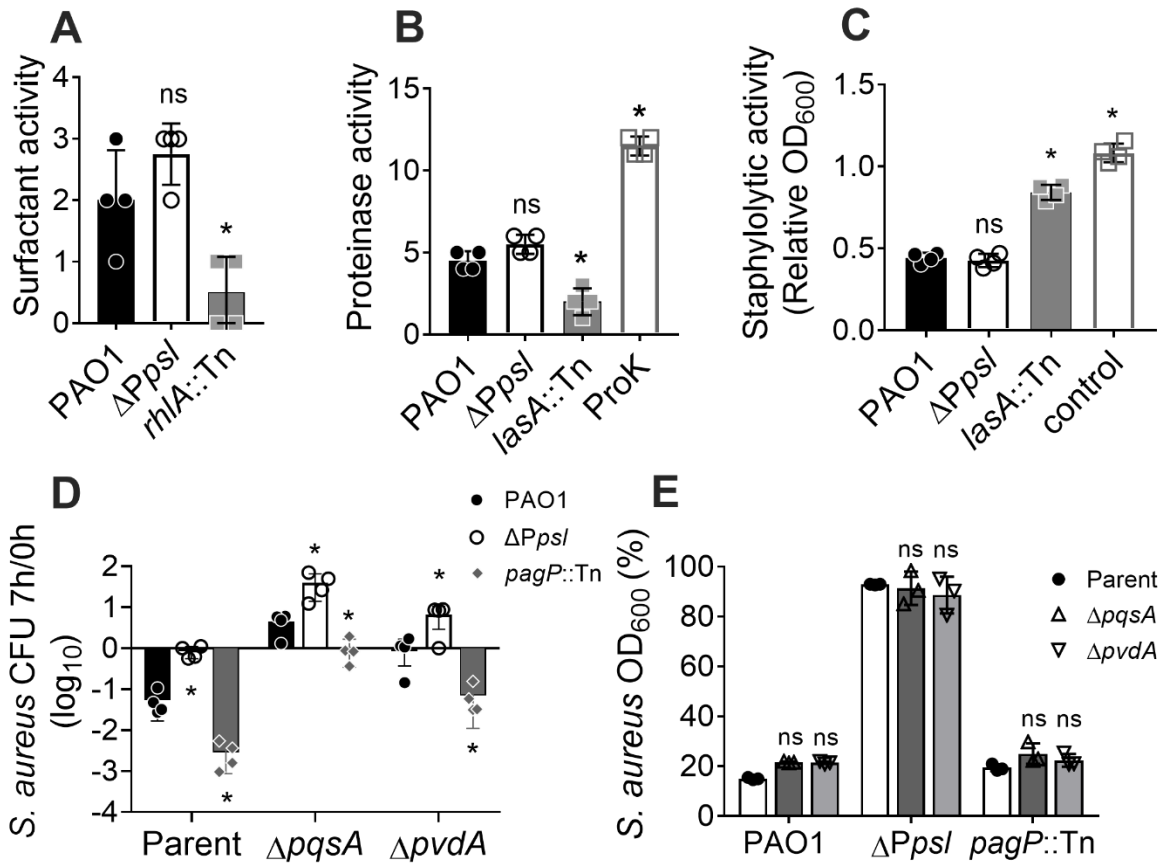

55 **Figure S4. PsI-mediated killing is independent of known *P. aeruginosa* mechanisms of *S.***  
 56 ***aureus* killing. (A)** Drop collapse assay was performed to quantify the surfactant activity of *P.*  
 57 *aeruginosa* PAO1,  $\Delta Ppsl$  and  $rhIA::Tn$ . Overnight *P. aeruginosa* spent media was serial diluted in  
 58 half, and spotted on a plastic surface which was then tilted at a 90° angle. The surfactant activity  
 59 score was calculated as the reciprocal of the greatest dilution at which there was still surfactant  
 60 activity (collapse of the droplet). Significance was determined with one-way ANOVA. \*,  $P < 0.05$   
 61 compared to PAO1 (N = 4, n = 3). **(B)** *P. aeruginosa* PAO1,  $\Delta Ppsl$  and  $lasA::Tn$  spent media, as  
 62 well as Proteinase K (ProK) were spotted on a skim milk agar plate and incubated at 37°C  
 63 overnight. The diameter (mm) of the clear zone was measured, as an indication of proteinase  
 64 activity. Significance was determined with one-way ANOVA. \*,  $P < 0.05$  compared to PAO1 (N =  
 65 4, n = 3). **(C)** The staphylytic activity was measured by OD<sub>600</sub> of heat-killed *S. aureus* USA300  
 66 incubated without (control) or with half-diluted PAO1,  $\Delta Ppsl$  and  $lasA::Tn$  spent media for 7h.

67 Significance was determined with one-way ANOVA. \*,  $P < 0.05$  compared to PAO1 (N = 4, n = 3).  
68 **(D)** *S. aureus* survivals, when cocultured with *pqsA* and *pvdA* mutants for 7hrs, were quantified  
69 by CFUs normalized to the starting CFUs at 0h. Significance was determined with Student's t-  
70 test. \*,  $P < 0.05$  compared to PAO1 (N = 4, n = 3). **(E)** *S. aureus* survival, treated with 100 $\mu$ g/ml  
71 cell-free Psl purified from PAO1,  $\Delta Ppsl$ , *pagP*::Tn,  $\Delta pqsA$ ,  $\Delta Ppsl\Delta pqsA$ , *pagP*::Tn $\Delta pqsA$ ,  $\Delta pvdA$ ,  
72  $\Delta Ppsl\Delta pvdA$  and *pagP*::Tn $\Delta pvdA$  for 16h, was quantified by OD<sub>600</sub> normalized to that of *S. aureus*  
73 grown alone. Significance was determined with two-way ANOVA. ns, not significant compared to  
74 parent (N = 3, n = 3). All data presented as mean  $\pm$  SD, individual points indicate the biological  
75 replicates.

76

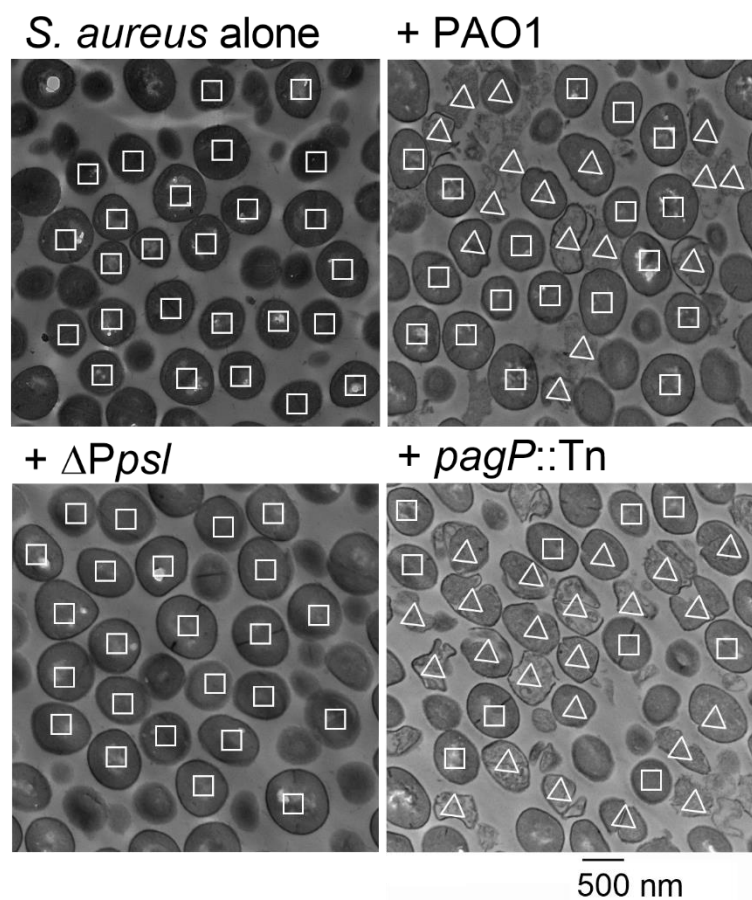

77 **Figure S5 Labeled *S. aureus* cells in TEM images.** *S. aureus* USA300 was incubated with spent  
78 media from *P. aeruginosa* PAO1,  $\Delta Ppsl$  or *pagP*::Tn for 2h. Changes in cell morphology were

79 visualized by TEM. Square labels all intact cells, while triangle labels all cells with disrupted cell  
80 envelopes from Figure 3A.

81

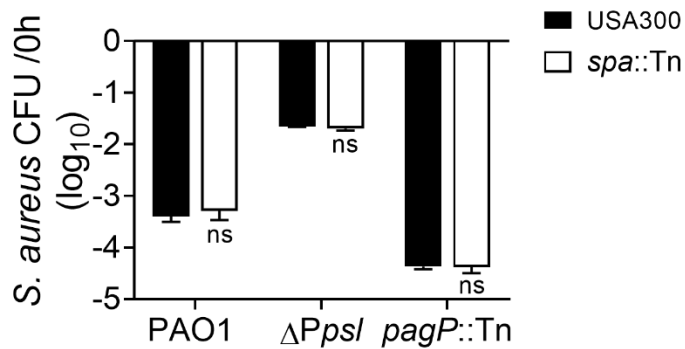

82 **Figure S6. *S. aureus* SpA plays no role in Psl-mediated killing.** The survival of *S. aureus*  
83 USA300 and *spa::Tn*, when co-cultured for 8h with *P. aeruginosa* PAO1, Δ*Ppsl* or *pagP::Tn*, was  
84 measured. *S. aureus* survival is presented as CFUs normalized to the starting CFU at 0h. Data  
85 presented as mean ± SD (N = 3, n = 3). Significance was determined with two-way ANOVA. ns,  
86 not significant compared to the parent.

87

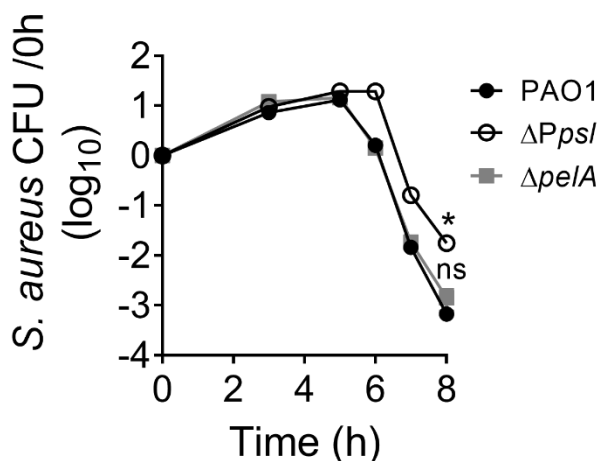

88 **Figure S7. *P. aeruginosa* Pel production has no effect on *S. aureus* survival.** *S. aureus*  
89 USA300 survival was measured when co-cultured for 8h with *P. aeruginosa* PAO1, Δ*Ppsl*, or a

90 *pelA* gene deletion mutant that does not produce Pel ( $\Delta pelA$ ). *S. aureus* survival is presented as  
91 CFUs normalized to the starting CFUs at 0h. Data presented as mean  $\pm$  SD, individual points  
92 indicate the mean of biological replicates (N = 3, n = 3). Significance was determined with  
93 Student's t-test, compared to PAO1 \*,  $P < 0.05$ , ns, not significant.

94

## 95 **References**

- 96 1. Deziel E, Lepine F, Milot S, Villemur R. 2003. rhlA is required for the production of a novel  
97 biosurfactant promoting swarming motility in *Pseudomonas aeruginosa*: 3-(3-  
98 hydroxyalkanoyloxy)alkanoic acids (HAAs), the precursors of rhamnolipids. *Microbiology*  
99 (Reading) 149:2005-13.
- 100 2. Casilag F, Lorenz A, Krueger J, Klawonn F, Weiss S, Hausler S. 2016. The LasB  
101 Elastase of *Pseudomonas aeruginosa* Acts in Concert with Alkaline Protease AprA To  
102 Prevent Flagellin-Mediated Immune Recognition. *Infect Immun* 84:162-71.
- 103 3. Kessler E, Safrin M, Olson JC, Ohman DE. 1993. Secreted LasA of *Pseudomonas*  
104 *aeruginosa* is a staphylolytic protease. *J Biol Chem* 268:7503-8.
- 105
